# Supplementary material for: Neurogenin 3 is regulated by neurotrophic tyrosine kinase receptor type 2 (TRKB) signaling in the adult human exocrine pancreas
Source: PubMed Central journal article supplement (PMC5034529; doi:10.1186/s12964-016-0146-x), 2016-09-22

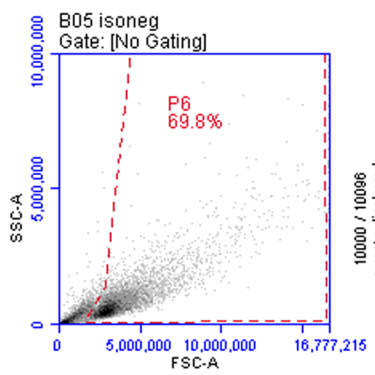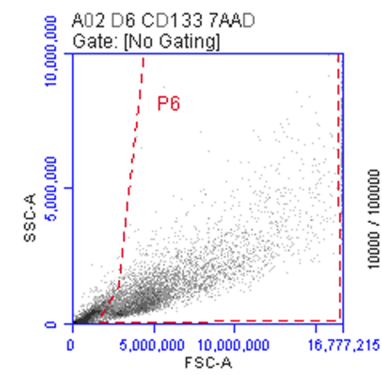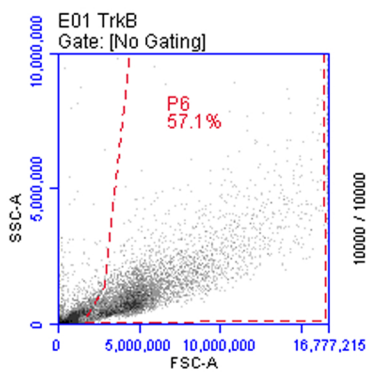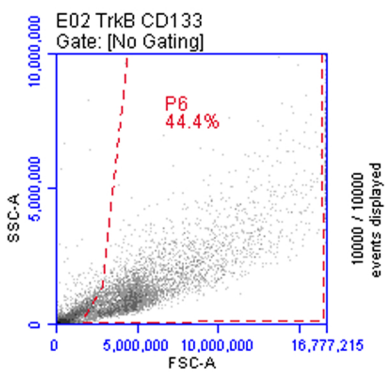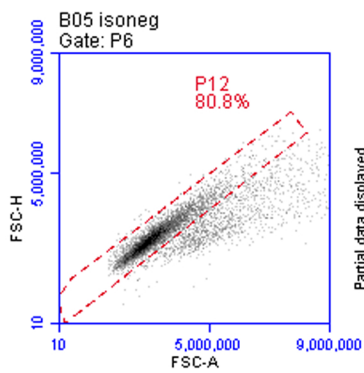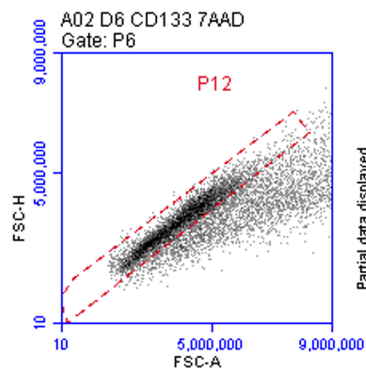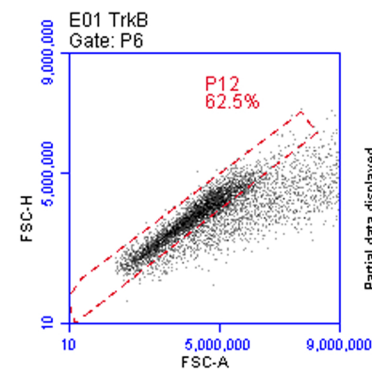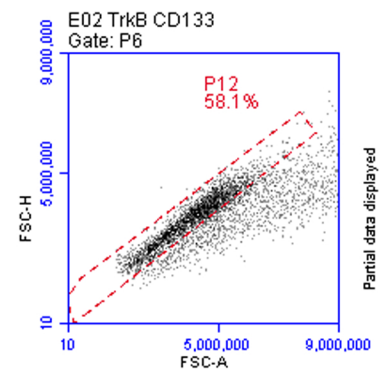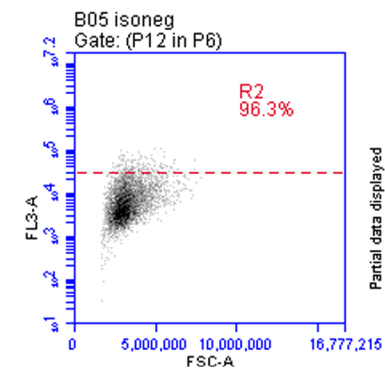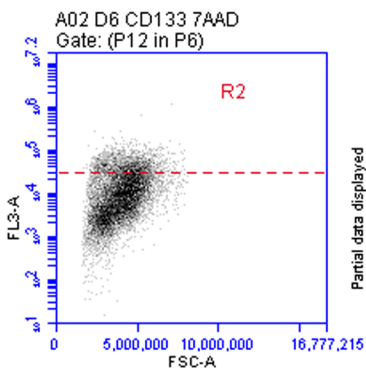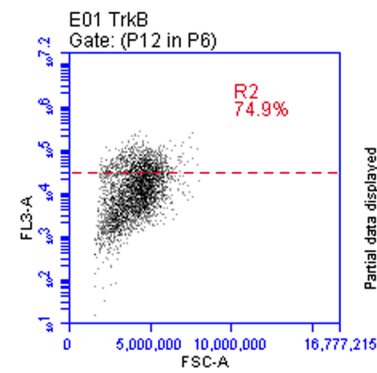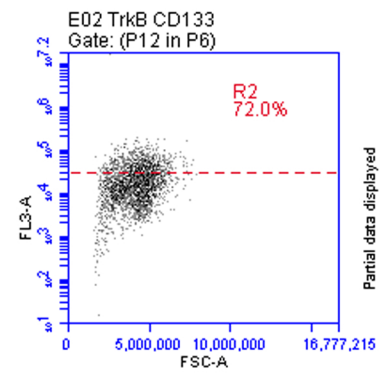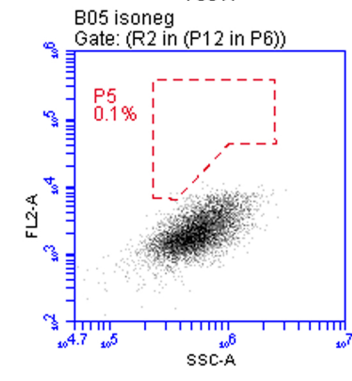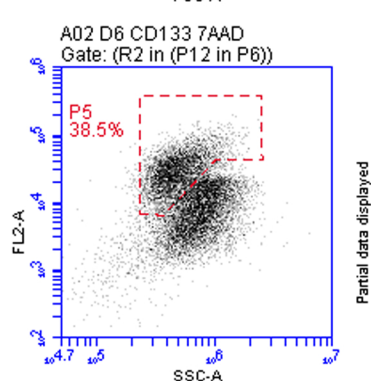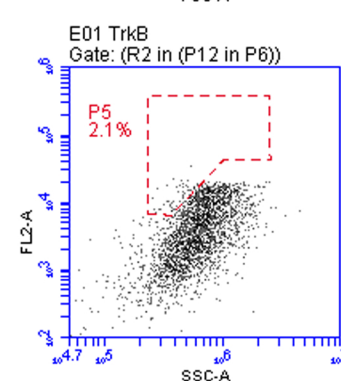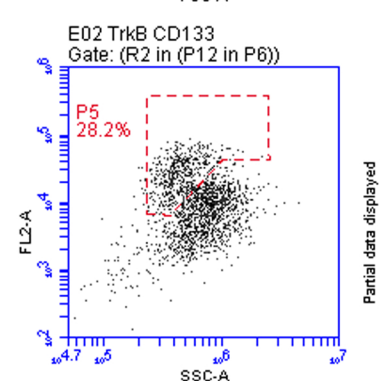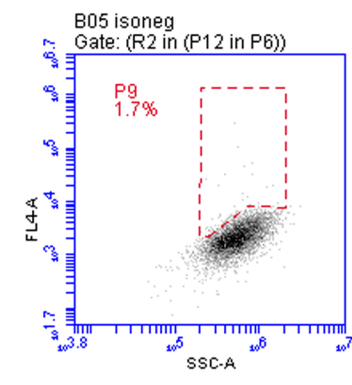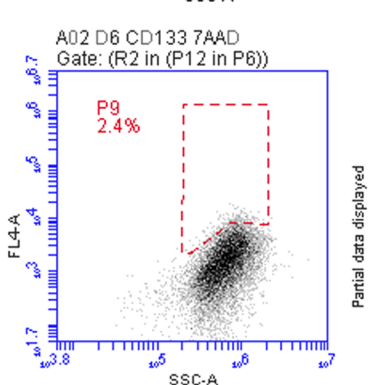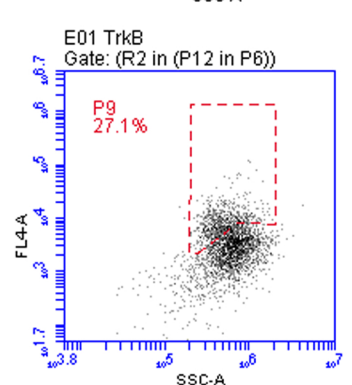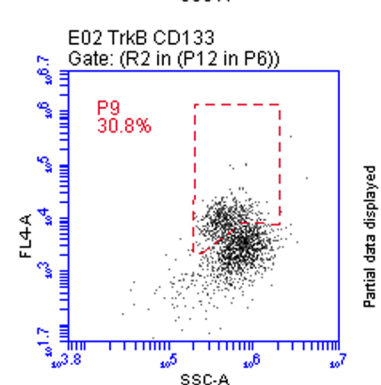

Supplement: 12964_2016_146_MOESM2_ESM.pdf [file 12964_2016_146_MOESM2_ESM.pdf]
